# Supplementary material
Source: bioRxiv or medRxiv preprint supplement (https://www.biorxiv.org/highwire/filestream/134307/field_highwire_adjunct_files/0/447375-1.pdf)
Supplement: Supplementary file [file 447375-1.pdf]

**Supplementary Figures for**  
**Quantitative Proteomic Analysis of Prostate Tissue Specimens Identifies Deregulated Protein**  
**Complexes in Primary Prostate Cancer**

Bo Zhou, Yiwu Yan, Yang Wang, Sungyong You, Michael R. Freeman, Wei Yang\*

Division of Cancer Biology and Therapeutics, Departments of Surgery and Biomedical Sciences, Samuel Oschin Comprehensive Cancer Institute, Cedars-Sinai Medical Center, 8700 Beverly Boulevard, Los Angeles, CA 90048

\*Corresponding Author  
Rm. 4009, Davis Research Bldg  
Cedars-Sinai Medical Center  
8700 Beverly Blvd  
Los Angeles, CA 90048  
Email: [wei.yang@cshs.org](mailto:wei.yang@cshs.org)  
Phone: +1 (310)423-7142

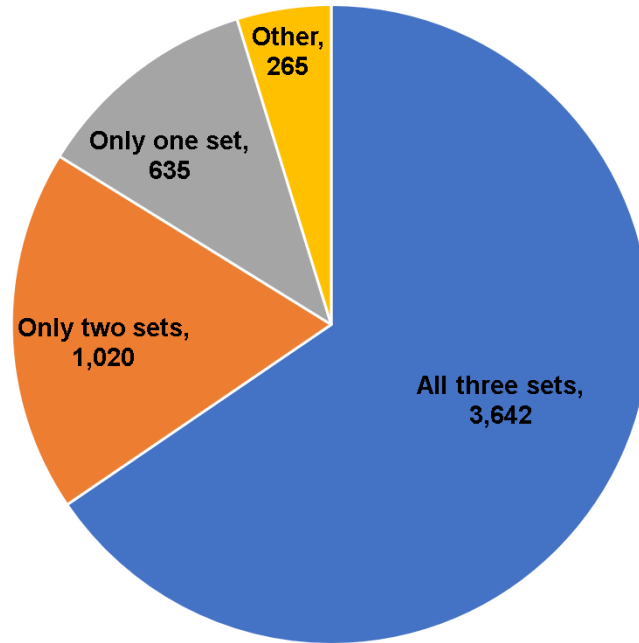

**Figure S1. Pie chart of protein groups quantified in different TMT10plex sets.** Of all the 5,562 identified protein groups, 3,642 protein groups were quantified in all the three sets (30 samples), 4,662 (3,642 + 1,020) protein groups were quantified in at least two sets, and 5,297 (4,662 + 635) protein groups were quantified in at least one TMT set.

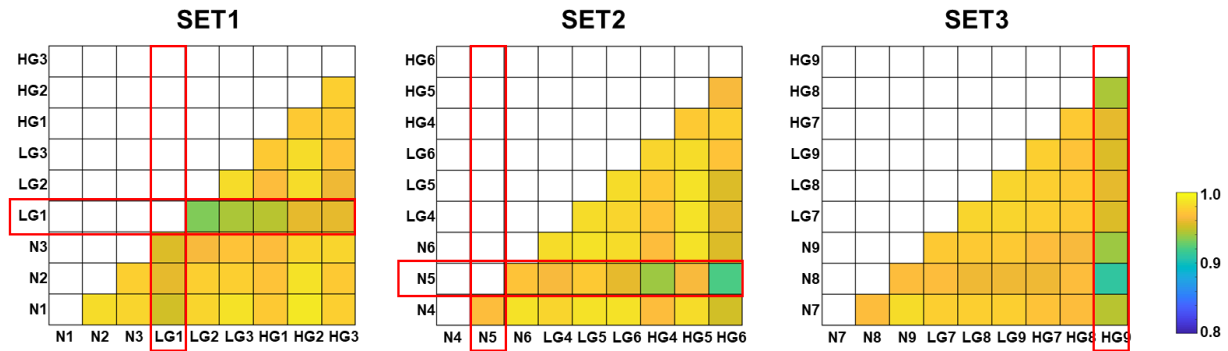

**Figure S2. Detection and removal of outlier samples.** The outlier samples were detected in each set using the SuperHirn, followed by visual inspection. Red box indicates similarity pattern of outlier samples with other samples in the same set. The samples LG1, N5, and HG9 were identified as outlier samples and were thus removed prior to further analysis.

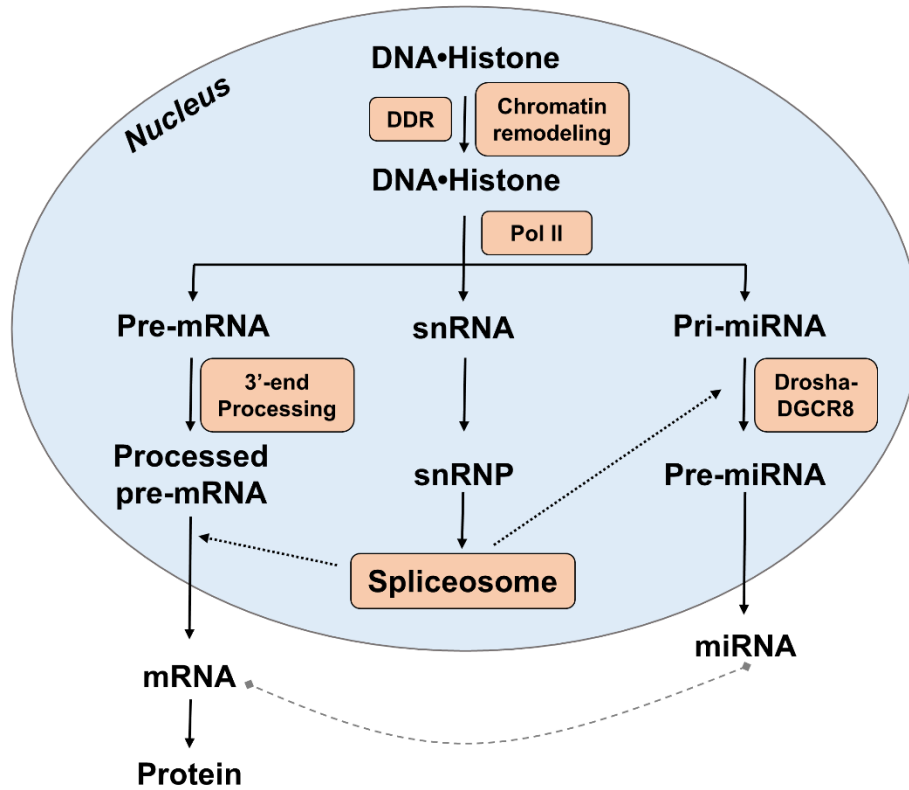

**Figure S3. Biological processes involving the protein complexes with increased assembly levels in low-grade prostate cancer, compared with normal prostate.** See Table 1 for specific protein complexes belonging to each class, which was shown in light orange box in this figure.
